# Supplementary material
Source: ML conference proceedings conference paper supplement (https://aclanthology.org/D17-1046)
Supplement: Attachment [file Error-Rate.pdf › why ADAGRAD Fails/2017_emnlp_adagrad_olda/figures/Error-Rate.pdf]

**Adagrad Error Rate**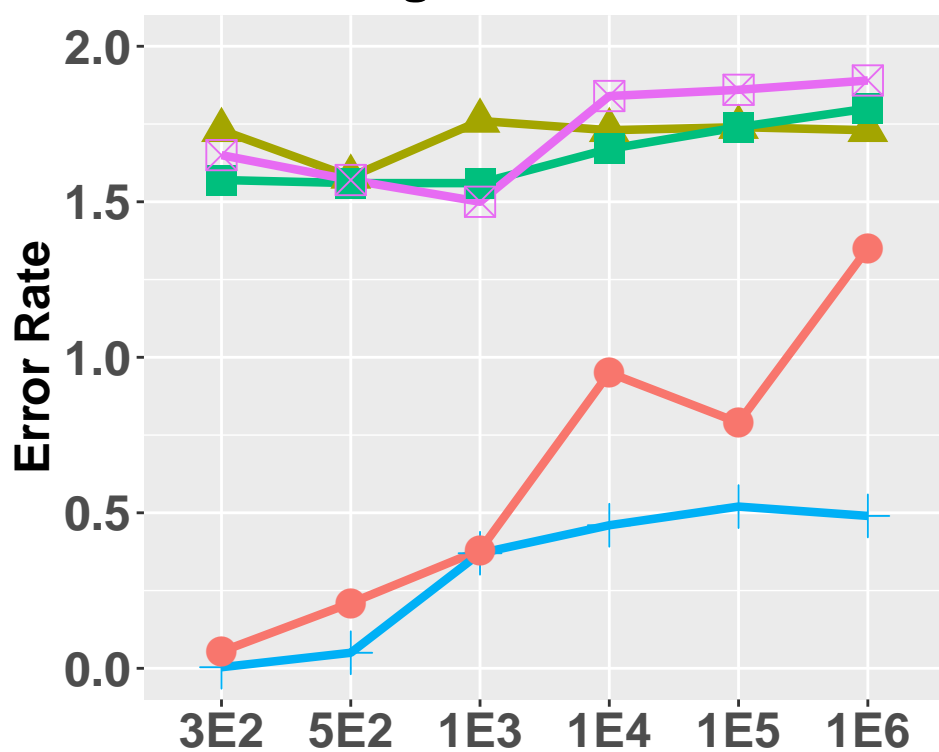**Constant Rate Error Rate**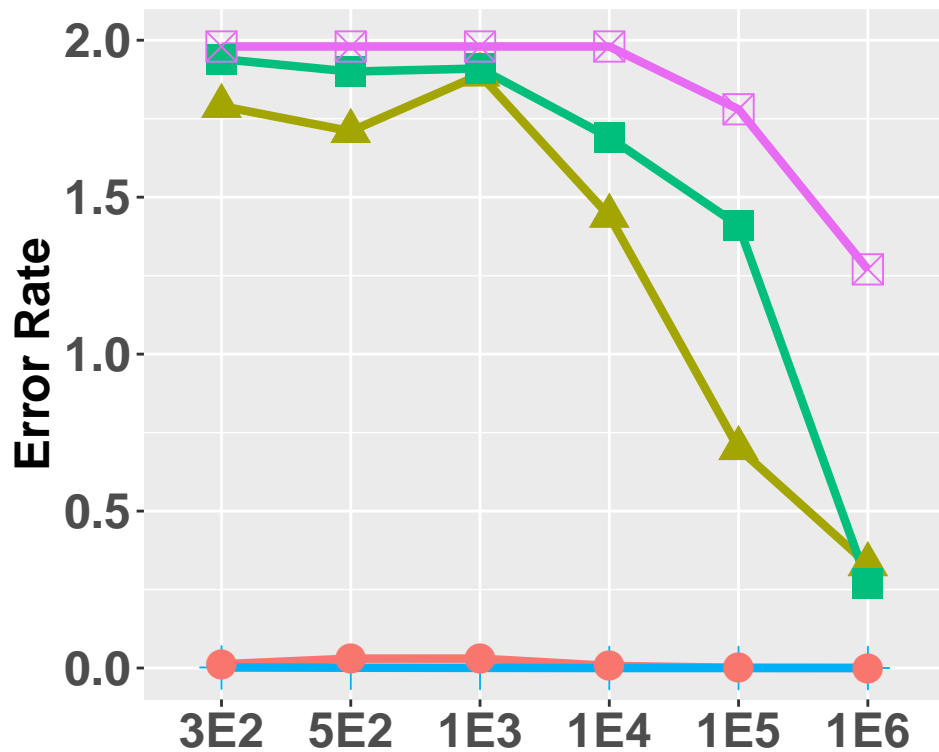**Adadelta Error Rate**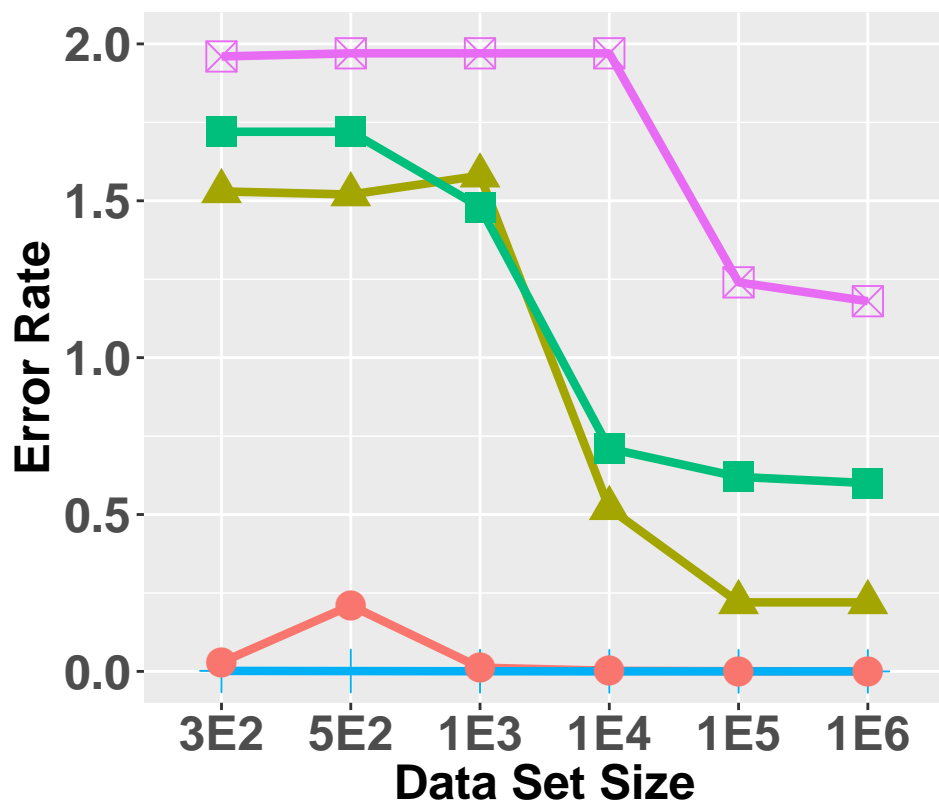**Adam Error Rate**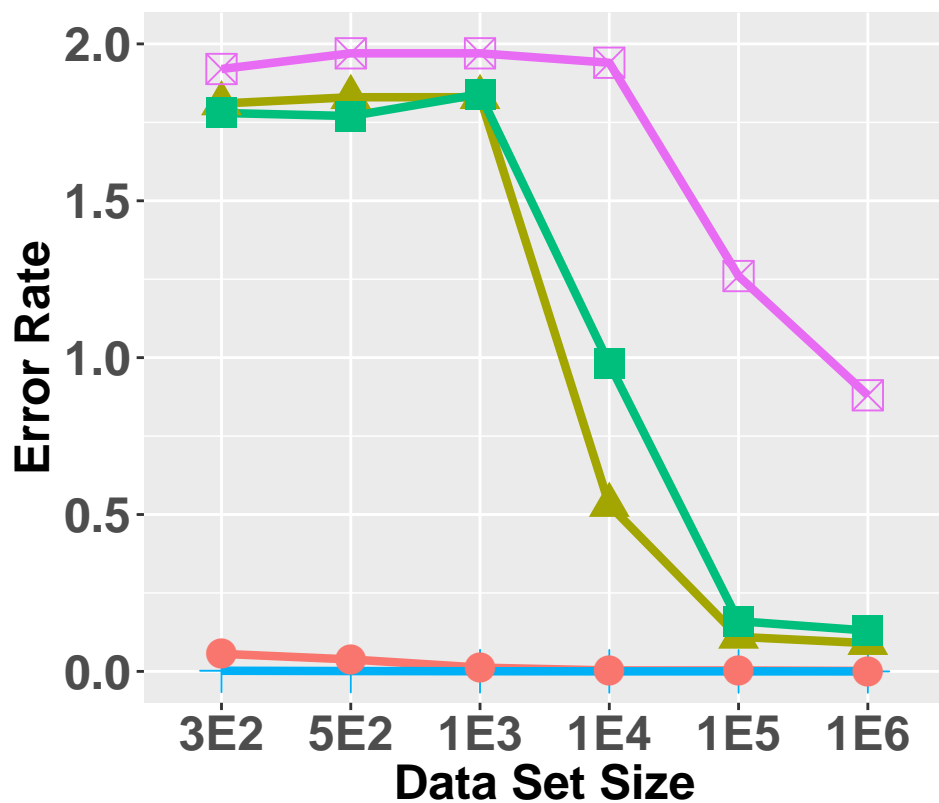

**Vocabulary Size** ● V=10 ▲ V=100 ■ V=1000 + V=2 ✕ V=5000
