# Supplementary material
Source: ML conference proceedings conference paper supplement (https://aclanthology.org/D17-1046)
Supplement: Attachment [file evolution-of-lambda.pdf › why ADAGRAD Fails/2017_emnlp_adagrad_olda/figures/evolution-of-lambda.pdf]

# Adagrad

# Constant

Iteration 0

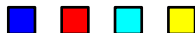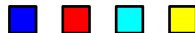

$\lambda$  scaled up

Iteration 5000

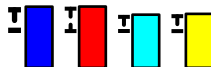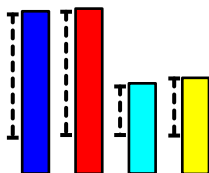

Iteration 10000

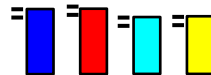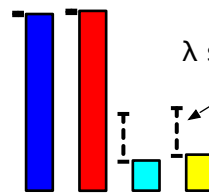

$\lambda$  scaled down

Iteration 20000

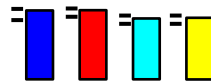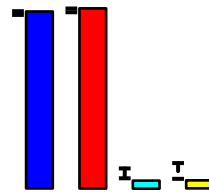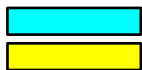

$\lambda$  of bottom words

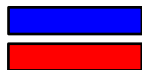

$\lambda$  of top words
