# Supplementary material
Source: ML conference proceedings conference paper supplement (https://aclanthology.org/D17-1046)

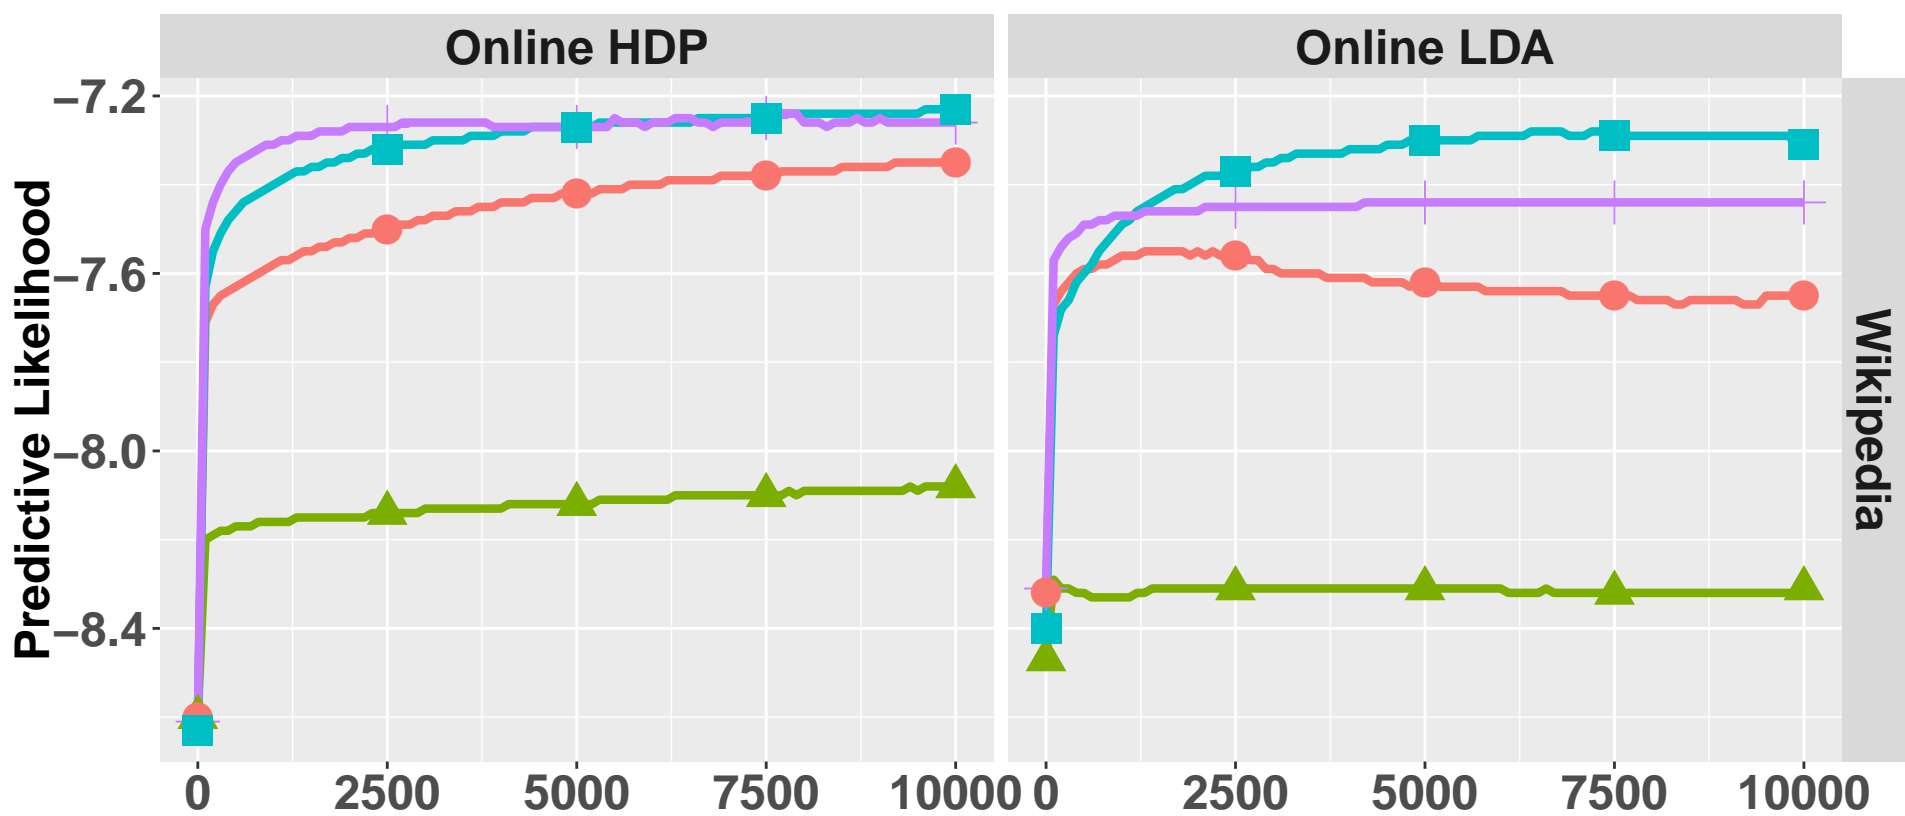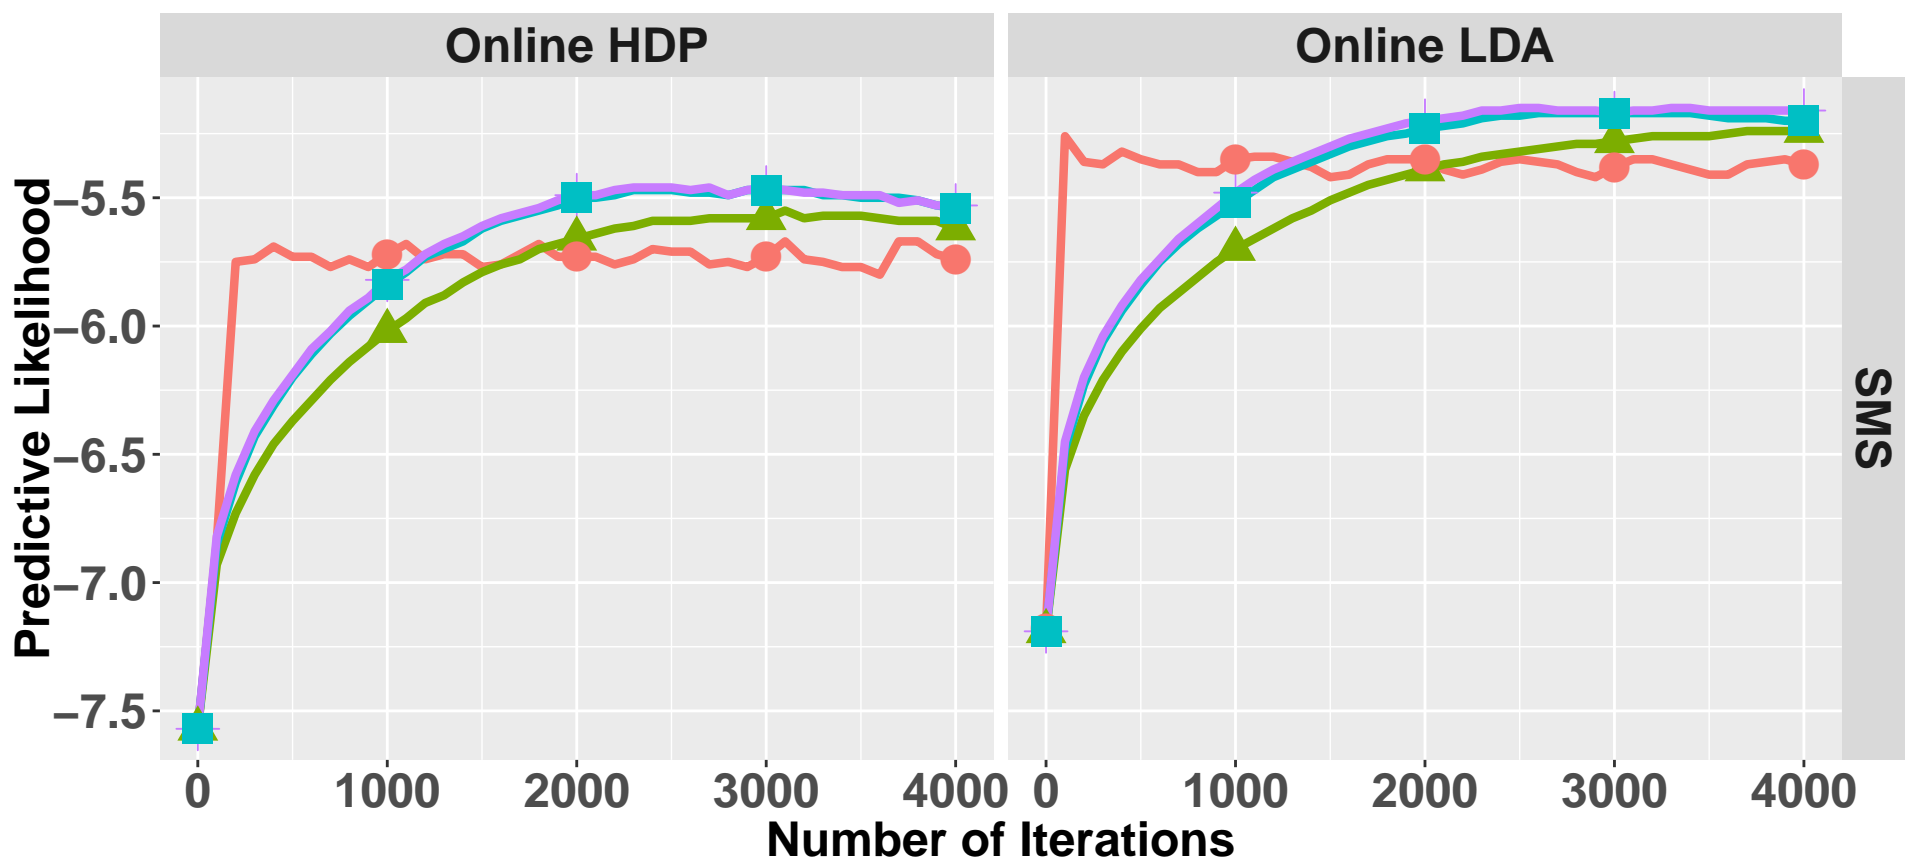

LearningRate ● Adadelata ▲ Adagrad ■ Adam + Constant

Supplement: Attachment [file Likelihood.pdf › why ADAGRAD Fails/2017_emnlp_adagrad_olda/figures/Likelihood.pdf]
